# Supplementary material for: Service Region Design for Urban Electric Vehicle Sharing Systems
Source: Atypon-hosted journal article supplement (doi:10.1287/msom.2016.0611), 2017-04-19
Supplement: msom.2016.0611-sm.pdf [file msom.2016.0611-sm.pdf]

# Service Region Design for Urban Electric Vehicle Sharing Systems

## Appendix A: Summary of the Notation

**Table 1 Notation**

| Parameter      | Units                   | Definition                                                          |
|----------------|-------------------------|---------------------------------------------------------------------|
| $f$            | \$                      | fixed (annual) membership fee                                       |
| $Q_{ik}$       | Scalar                  | Population of customer group $k$ in area $i$                        |
| $g_i$          | \$                      | Fixed cost of serving area $i$                                      |
| $r$            | \$ per unit time per EV | Usage based price of the service                                    |
| $t_{ij}$       | unit of time            | Expected travel time to destination $j$ from origin $i$             |
| $c$            | \$                      | Average charging cost each time                                     |
| $\eta$         | \$ per unit of time     | Repositioning cost                                                  |
| $\tau_{ij}$    | unit of time            | Expected reposition time to destination $j$ from origin $i$         |
| $h$            | \$                      | Annually amortized EV cost                                          |
| $a_{ij}$       | Scalar random variable  | Utility of serving destination $j$ for a customer in area $i$       |
| $\bar{a}_{ij}$ | Scalar                  | Expected value of $a_{ij}$                                          |
| $\Gamma_i$     | Scalar                  | Covariance matrix of $a_{ij}$ for area $i$                          |
| $b_k$          | Scalar                  | Aspirational level for a customer in group $k$ to adopt the service |
| $\mu_i$        | Trips per unit of time  | Outbound trip rate from area $i$                                    |
| $P_{ij}$       | [0,1]                   | Probability of trip destination $j$ given the origin $i$            |
| $w_{ik}$       | [0,1]                   | Weight (in trip) of customer group $k$ in area $i$                  |
| $\alpha$       | (0,1)                   | Service level                                                       |
| $P_c$          | [0,1]                   | Probability of an arrival EV needs recharge                         |
| $t_c$          | unit time per EV        | Average charging time per EV                                        |

  

| Decision Variables | Units                  | Definition                                       |
|--------------------|------------------------|--------------------------------------------------|
| $x_i$              | {0,1}                  | 1 if area $i$ is served; 0 otherwise.            |
| $q_{ik}$           | [0,1]                  | Adoption rate of customer group $k$ in area $i$  |
| $N$                | EVs                    | Fleet size                                       |
| $\Psi_{ij}$        | Trips per unit of time | Trip demand rate from $i$ to $j$                 |
| $\psi'_{ij}$       | Trips per unit of time | Satisfied trip rate if $j$ is served             |
| $\psi_{ij}$        | Trips per unit of time | Satisfied trip rate: $\psi_{ij} = \psi'_{ij}x_j$ |
| $\phi_{ij}$        | Trips per unit of time | Repositioning trip rate from $i$ to $j$          |
| $\lambda_i$        | Trips per unit of time | EV arrival rate at charging stations in area $i$ |

## Appendix B: Proofs of Analytical Results

### B.1. Proof of Lemma 1

We begin the proof with deriving the formulation for the worst-case adoption rate in (4) following a similar approach as in El Ghaoui et al. (2003). For ease of exposition, it is safe to temporarily drop the index  $i \in I$  and  $k \in K$ . Given the service region decision  $\mathbf{x}$ , solving the following optimization problem yields the worst-case non-adoption rate  $V(\mathbf{x}) = \sup \text{Prob}(\sum_{j \in J} a_{ij}x_j \leq b_k)$ :

$$\begin{aligned} & \max \mathbb{E}[I(\mathbf{a})] \\ & \text{s.t.} \\ & \int_{\mathbb{R}_+^n} \begin{bmatrix} \mathbf{a} \\ 1 \end{bmatrix} \begin{bmatrix} \mathbf{a} \\ 1 \end{bmatrix}^T p(\mathbf{a}) d\mathbf{a} = \Sigma \end{aligned}$$

where  $p$  is the probability density function and  $I(\mathbf{a})$  is the indicator function defined as

$$I(\mathbf{a}) = \begin{cases} 1, & \text{if } \sum_{j \in J} a_j x_j \leq b \\ 0, & \text{otherwise} \end{cases}$$

We write the Lagrange function with symmetric multiplier matrix  $M \in \mathcal{S}_{n+1}$  as:

$$\begin{aligned} L(p, \mathbf{M}) &= \int_{\mathbb{R}_+^n} I(\mathbf{a})p(\mathbf{a})d\mathbf{a} + \left\langle \mathbf{M}, \boldsymbol{\Sigma} - \int_{\mathbb{R}_+^n} \begin{bmatrix} \mathbf{a} \\ 1 \end{bmatrix} \begin{bmatrix} \mathbf{a} \\ 1 \end{bmatrix}^T p(\mathbf{a})d\mathbf{a} \right\rangle \\ &= \langle \mathbf{M}, \boldsymbol{\Sigma} \rangle + \int_{\mathbb{R}_+^n} (I(\mathbf{a}) - l(\mathbf{a}))p(\mathbf{a})d\mathbf{a} \end{aligned}$$

where  $l(\mathbf{a}) = [\mathbf{a} \ 1]\mathbf{M}[\mathbf{a} \ 1]^T$ . Since  $\boldsymbol{\Sigma} \succ 0$ , strong duality holds. Therefore, we have

$$V(\mathbf{x}) = \inf_{\mathbf{M}=\mathbf{M}^T} \sup_p L(p, \mathbf{M})$$

where

$$\begin{aligned} \sup_p L(p, \mathbf{M}) &= \langle \mathbf{M}, \boldsymbol{\Sigma} \rangle + \sup_{p \in \mathcal{P}} \int_{\mathbb{R}_+^n} (I(\mathbf{a}) - l(\mathbf{a}))p(\mathbf{a})d\mathbf{a} \\ &= \begin{cases} \langle \mathbf{M}, \boldsymbol{\Sigma} \rangle, & \text{if } I(\mathbf{a}) - l(\mathbf{a}) \leq 0, \forall \mathbf{a} \in \mathbb{R}_+^n \\ +\infty, & \text{otherwise.} \end{cases} \end{aligned}$$

$V(\mathbf{x})$  is finite if and only if  $I(\mathbf{a}) - l(\mathbf{a}) \leq 0, \forall \mathbf{a} \in \mathbb{R}_+^n$ . There are two cases:

1.  $l(\mathbf{a}) \geq 0, \forall \mathbf{a} \in \mathbb{R}_+^n$ .
2.  $l(\mathbf{a}) \geq 1, \forall \mathbf{a} \in \mathbb{R}_+^n$  such that  $\sum_{j \in J} a_j x_j \leq b$ .

Case 1 is equivalent to  $\mathbf{M} \succeq_{co} 0$  and Case 2 holds if there exist a scalar  $\tau \geq 0$  such that,  $l(\mathbf{a}) \geq 1 - 2\tau(\mathbf{a}^T \mathbf{x} - b)$ .

In addition, the Slater's condition is satisfied as there exist an  $\mathbf{a}$  such that  $\sum_{j \in J} a_j x_j < b$ . As a result, the above constraint for Case 2 is also sufficient. Equivalently, it can be written as  $\mathbf{M} + \begin{bmatrix} 0 & \tau \mathbf{x} \\ \tau \mathbf{x}^T & -1 - 2\tau b \end{bmatrix} \succeq_{co} 0$ .

$V(\mathbf{x})$  is then the solution to the following copositive program (CP):

$$\begin{aligned} V(\mathbf{x}) &= \min \langle \mathbf{M}, \boldsymbol{\Sigma} \rangle \\ \text{s.t.} & \\ & \tau \geq 0 \\ & \mathbf{M} \succeq_{co} 0 \\ & \mathbf{M} + \begin{bmatrix} 0 & \tau \mathbf{x} \\ \tau \mathbf{x}^T & -1 - 2\tau b \end{bmatrix} \succeq_{co} 0. \end{aligned}$$

We then complete the proof by restoring the indices  $i \in I$  and  $k \in K$  and replacing  $V(\mathbf{x}) \leq 1 - q$  (as  $V(\mathbf{x})$  is the non-adoption rate) with the above CP:

$$\begin{aligned} \langle \mathbf{M}_{ik}, \boldsymbol{\Sigma}_i \rangle &\leq 1 - q \\ \tau_{ik} &\geq 0 \\ \mathbf{M}_{ik} &\succeq_{co} 0 \\ \mathbf{M}_{ik} + \begin{bmatrix} 0 & \tau_{ik} \mathbf{x} \\ \tau_{ik} \mathbf{x}^T & -1 - 2\tau_{ik} b_k \end{bmatrix} &\succeq_{co} 0 \end{aligned}$$

The last step is to linearize the term  $\tau_{ik} \mathbf{x}$ . Since  $\mathbf{x}$  is a binary vector and  $\tau_{ik}$  is continuous, we can replace the term  $\tau_{ik} \mathbf{x}$  by vector  $\mathbf{d}_{ik}$  with the following constraints:

$$\begin{aligned} -\rho \mathbf{x} &\leq \mathbf{d}_{ik} \\ \mathbf{d}_{ik} &\leq \rho \mathbf{x} \\ \tau_{ik} \mathbf{e} + \rho(\mathbf{x} - \mathbf{e}) &\leq \mathbf{d}_{ik} \\ \mathbf{d}_{ik} &\leq \tau_{ik} \mathbf{e} + \rho(\mathbf{e} - \mathbf{x}) \end{aligned}$$

where  $\rho$  is a large scalar and  $\mathbf{e}$  is the vector of ones. This completes the proof.

## B.2. Proof of Proposition 1

By restricting the copositive constraints with semidefinite constraints, we obtain a lower bound to the optimal solution to the formulation with copositive constraints in Lemma 1. When  $\Theta(\mathbf{q}, \mathbf{x})$  is linear, the following formulation is a mixed integer semidefinite program (MISDP):

$$\max_{q_{ik}, x_i, \mathbf{M}_{ik}, \tau_{ik}, \mathbf{d}_{ik}} \sum_{i \in I} \sum_{k \in K} f Q_{ik} q_{ik} - \sum_{i \in I} g_i x_i + \Theta(\mathbf{q}, \mathbf{x})$$

s.t.

$$\langle \mathbf{M}_{ik}, \boldsymbol{\Sigma}_{ik} \rangle \leq 1 - q_{ik}, \forall i \in I, \forall k \in K \quad (1)$$

$$\mathbf{M}_{ik} \succeq 0, \forall i \in I, \forall k \in K \quad (2)$$

$$\mathbf{M}_{ik} + \begin{bmatrix} 0 & \mathbf{d}_{ik} \\ \mathbf{d}_{ik}^T & -1 - 2\tau_{ik}b_k \end{bmatrix} \succeq 0, \forall i \in I, \forall k \in K \quad (3)$$

$$-\rho \mathbf{x} \leq \mathbf{d}_{ik}, \forall i \in I, \forall k \in K \quad (4)$$

$$\mathbf{d}_{ik} \leq \rho \mathbf{x}, \forall i \in I, \forall k \in K \quad (5)$$

$$\tau_{ik} \mathbf{e} + \rho(\mathbf{x} - \mathbf{e}) \leq \mathbf{d}_{ik}, \forall i \in I, \forall k \in K \quad (6)$$

$$\mathbf{d}_{ik} \leq \tau_{ik} \mathbf{e} + \rho(\mathbf{e} - \mathbf{x}), \forall i \in I, \forall k \in K \quad (7)$$

$$\tau_{ik} \geq 0, \forall i \in I, \forall k \in K \quad (8)$$

$$q_{ik} \leq x_i, \forall i \in I, \forall k \in K$$

$$x_i \in \{0, 1\}, \forall i \in I.$$

From Appendix B.1, we note that constraints (4)-(7) are imposed to linearize the term  $\tau_{ik}\mathbf{x}$ . Let us temporarily restore the nonlinear term  $\tau_{ik}\mathbf{x}$ , and the constraints (1)-(8) become:

$$\langle \mathbf{M}_{ik}, \boldsymbol{\Sigma}_{ik} \rangle \leq 1 - q_{ik}, \forall i \in I, \forall k \in K$$

$$\mathbf{M}_{ik} \succeq 0, \forall i \in I, \forall k \in K$$

$$\mathbf{M}_{ik} + \begin{bmatrix} 0 & \tau_{ik}\mathbf{x} \\ \tau_{ik}\mathbf{x}^T & -1 - 2\tau_{ik}b_k \end{bmatrix} \succeq 0, \forall i \in I, \forall k \in K$$

$$\tau_{ik} \geq 0, \forall i \in I, \forall k \in K.$$

Moreover, it can be shown that  $\tau_{ik}$  in the optimal solution is strictly positive (as long as an optimal solution exists), as  $\tau_{ik} = 0$  leads to  $q_{ik} \leq 0$ . We are then able to rewrite the above constraints as follows, by defining new variables  $\tilde{\tau}_{ik} = \frac{1}{\tau_{ik}} \geq 0$  and  $\tilde{\mathbf{M}}_{ik} = \mathbf{M}_{ik} \tilde{\tau}_{ik}$ :

$$\langle \tilde{\mathbf{M}}_{ik}, \boldsymbol{\Sigma}_{ik} \rangle \leq \tilde{\tau}_{ik}(1 - q_{ik}), \forall i \in I, \forall k \in K \quad (9)$$

$$\tilde{\mathbf{M}}_{ik} \succeq 0, \forall i \in I, \forall k \in K \quad (10)$$

$$\tilde{\mathbf{M}}_{ik} + \begin{bmatrix} 0 & \mathbf{x} \\ \mathbf{x}^T & -\tilde{\tau}_{ik} - 2b_k \end{bmatrix} \succeq 0, \forall i \in I, \forall k \in K \quad (11)$$

$$\tilde{\tau}_{ik} \geq 0, \forall i \in I, \forall k \in K \quad (12)$$

We now show that constraints (9)-(12) can be reformulated in second-order conic form. Let  $\mathcal{P}$  be the set of probability distributions with mean  $\mu$  and covariance matrix  $\boldsymbol{\Gamma} \succ 0$ . Let  $\epsilon \in (0, 1]$  and  $\gamma \in \mathbb{R}$  given. The following propositions are equivalent (El Ghaoui et al. 2003):

1.  $\sqrt{\frac{1-\epsilon}{\epsilon}} \sqrt{\mathbf{x}^T \mathbf{\Gamma}_i \mathbf{x}} - \mu^T \mathbf{x} \leq \gamma$
2. There exist a symmetric matrix  $\mathbf{M}$  and  $\tau \in \mathbb{R}$  such that

$$\begin{aligned} \langle \mathbf{M}, \mathbf{\Sigma} \rangle &\leq \tau \epsilon \\ \mathbf{M} &\succeq 0 \\ \mathbf{M} + \begin{bmatrix} 0 & \mathbf{x} \\ \mathbf{x}^T & -\tau + 2\gamma \end{bmatrix} &\succeq 0 \\ \tau &\geq 0 \end{aligned}$$

where  $\mathbf{\Sigma}$  is the second-moment matrix.

By viewing  $1 - q_{ik}$  as  $\epsilon$  and  $-b_k$  as  $\gamma$  in the above result, the semidefinite constraint (9)-(12) can be expressed as

$$\begin{aligned} \sqrt{\frac{q_{ik}}{1 - q_{ik}}} \sqrt{X^T \mathbf{\Gamma}_i X} - \bar{\mathbf{a}}_i^T \mathbf{x} + b_k &\leq 0 \\ \equiv \begin{cases} 1 - q_{ik} \geq \frac{\mathbf{x}^T \mathbf{\Gamma}_i \mathbf{x}}{(\bar{\mathbf{a}}_i^T \mathbf{x} - b_k)^2 + \mathbf{x}^T \mathbf{\Gamma}_i \mathbf{x}} \\ \bar{\mathbf{a}}_i^T \mathbf{x} - b_k \geq 0. \end{cases} \end{aligned} \quad (13)$$

In the case of  $\bar{\mathbf{a}}_i^T \mathbf{x} - b_k \leq 0$ , the worst case probability is 1, because there exists a feasible two-point distribution of  $\bar{\mathbf{a}}_i^T \mathbf{x}$  with both points less than  $b_k$ . To allow such possibility, we further introduce a set of disjunctive constraints. When  $\bar{\mathbf{a}}_i^T \mathbf{x} - b_k \leq 0$ , we set  $q_{ik}$  to 0. Therefore, we have either  $\bar{\mathbf{a}}_i^T \mathbf{x} \geq b_k$  or  $q_{ik} = 0$ . By introducing new variables, we can express the disjunctive constraints as the feasible set:

$$\mathcal{X}_{ik} = \left\{ (\mathbf{x}, q_{ik}) : \begin{array}{l} b_k u_{ik} \leq \bar{\mathbf{a}}_i^T \mathbf{x} \\ q_{ik} \leq u_{ik} \\ u_{ik} \in \{0, 1\} \end{array} \right\}. \quad (14)$$

Moreover, we linearize the term  $x_{j_1} x_{j_2}$  with  $z_{j_1 j_2}$  defined in

$$\mathcal{Z} = \left\{ (z_{j_1 j_2}, x_{j_1}, x_{j_2}) : \begin{array}{l} z_{j_1 j_2} \leq x_{j_1} \\ z_{j_1 j_2} \leq x_{j_2} \\ x_{j_1} + x_{j_2} - 1 \leq z_{j_1 j_2} \\ z_{j_1 j_2} \geq 0 \end{array} \right\}. \quad (15)$$

Lastly, the first inequality in constraint (13) can be expressed as  $(1 - q_{ik} + (\bar{\mathbf{a}}_i^T \mathbf{x} - b_k)^2 + \mathbf{x}^T \mathbf{\Gamma}_i \mathbf{x})^2 \geq 4\mathbf{x}^T \mathbf{\Gamma}_i \mathbf{x} + (1 - q_{ik} - (\bar{\mathbf{a}}_i^T \mathbf{x} - b_k)^2 - \mathbf{x}^T \mathbf{\Gamma}_i \mathbf{x})^2$ . Since  $z_{j_1 j_2} = x_{j_1} x_{j_2}$  in (15), we further linearize the terms  $(\bar{\mathbf{a}}_i^T \mathbf{x})^2$  and  $\mathbf{x}^T \mathbf{\Gamma}_i \mathbf{x}$  as  $\sum_{(j_1, j_2) \in I \times I} \bar{a}_{ij_1} \bar{a}_{ij_2} z_{j_1 j_2}$  and  $\sum_{(j_1, j_2) \in I \times I} \sigma_{ij_1 j_2} z_{j_1 j_2}$  respectively. Let  $v_{ik} = b_k^2 + \sum_{(j_1, j_2) \in I \times I} (\bar{a}_{ij_1} \bar{a}_{ij_2} + \sigma_{ij_1 j_2}) z_{j_1 j_2} - 2b_k \sum_{j \in I} \bar{a}_{ij} x_j$ , it is reorganized as  $\left\| \begin{array}{c} 1 - q_{ik} - v_{ik} \\ 2\mathbf{\Gamma}_i^{\frac{1}{2}} \mathbf{x} \end{array} \right\|_2 \leq 1 - q_{ik} + v_{ik}$  and leads to the second-order cone constraint (5).

### B.3. Detailed Formulation of the MISOCP (22)

$$\begin{aligned} \max_{\substack{x_i, q_{ik}, N, \Psi_{ij} \\ \psi_{ij}, \psi'_{ij}, \phi_{ij}, \lambda_i}} & \sum_{i \in I} \sum_{k \in K} f Q_{ik} q_{ik} - \sum_{i \in I} g_i x_i + \xi \left( \sum_{j \in I} \sum_{i \in I} r t_{ij} \psi_{ij} - \sum_{i \in I} \sum_{j \in I} \eta \tau_{ij} \phi_{ij} - \sum_{i \in I} c \lambda_i \right) - hN \\ \text{s.t.} & \\ & \left\| \begin{array}{c} 1 - q_{ik} - v_{ik} \\ 2\mathbf{\Gamma}_i^{\frac{1}{2}} \mathbf{x} \end{array} \right\|_2 \leq 1 - q_{ik} + v_{ik}, \forall i \in I, \forall k \in K \\ & v_{ik} = b_k^2 + \sum_{(j_1, j_2) \in I \times I} (\bar{a}_{ij_1} \bar{a}_{ij_2} + \sigma_{ij_1 j_2}) z_{j_1 j_2} - 2b_k \sum_{j \in I} \bar{a}_{ij} x_j, \forall i \in I, \forall k \in K \end{aligned}$$

$$\begin{aligned}
q_{ik} &\leq x_i, \forall i \in I, \forall k \in K \\
\Psi_{ij} &= P_{ij} \mu_i \sum_{k \in K} w_{ik} q_{ik}, \forall i, j \in I \\
\psi'_{ij} &\geq \alpha \Psi_{ij}, \forall i, j \in I \\
\psi'_{ij} &\leq \Psi_{ij}, \forall i, j \in I \\
\psi'_{ij} &= P_{ij} \sum_{l \in I} \psi'_{il}, \forall i, j \in I \\
\psi_{ij} &\leq \psi'_{ij}, \forall i, j \in I \\
\psi_{ij} &\leq P_{ij} \mu_i x_j, \forall i, j \in I \\
\psi'_{ij} + P_{ij} \mu_i (x_j - 1) &\leq \psi_{ij}, \forall i, j \in I \\
\sum_j \psi_{ji} + \sum_j \phi_{ji} &= \sum_j \psi_{ij} + \sum_j \phi_{ij}, \forall i \in I \\
\lambda_i &= P_c \sum_{j \in J} \psi_{ji}, \forall i \in I \\
\sum_{i \in I} \frac{\alpha}{1 - \alpha} x_i + \sum_{j \in I} \sum_{i \in I} t_{ij} \psi_{ij} + \sum_{i \in I} \sum_{j \in I} \tau_{ij} \phi_{ij} + \sum_{i \in I} t_c \lambda_i &\leq N \\
(z_{j_1 j_2}, x_{j_1}, x_{j_2}) &\in \mathcal{Z}, \forall j_1, j_2 \in I \\
(\mathbf{x}, q_{ik}) &\in \mathcal{X}_{ik}, \forall i \in I, \forall k \in K \\
N, q_{ik}, \psi_{ij}, \psi'_{ij}, \Psi_{ij}, \phi_{ij}, \lambda_i &\geq 0, \forall i, j \in I, k \in K \\
x_i &\in \{0, 1\}, \forall i \in I.
\end{aligned}$$

#### B.4. Time-varying Travel Pattern

The customer adoption decision depends only on the service region coverage and thus the constraints (3) and (5)-(7) from the adoption rate model still hold. To deal with time-varying travel patterns, we partition the day into  $T$  periods (indexed by  $t$ ), within each of which the travel pattern is assumed (approximated) to be stationary, i.e., represented by  $P_{ij}^t$  and  $\mu_i^t$  for each period  $t$ . Let  $l(t)$  be the length of period  $t$ , the problem in the presence of time-varying travel patterns, following the pointwise stationary approximation (Green and Kolesar 1991), is then formulated as:

$$\begin{aligned}
&\max_{\substack{x_i, q_{ik}, N, \Psi_{ij}^t \\ \psi_{ij}^t, \psi'_{ij}^t, \phi_{ij}^t, \lambda_i^t}} \sum_{i \in I} \sum_{k \in K} f Q_{ik} q_{ik} - \sum_{i \in I} g_i x_i + \xi \sum_{t \in T} l(t) \left( \sum_{j \in I} \sum_{i \in I} r t_{ij} \psi_{ij}^t - \sum_{i \in I} \sum_{j \in I} \eta \tau_{ij} \phi_{ij}^t - \sum_{i \in I} c \lambda_i^t \right) - hN \\
&\text{s.t.}
\end{aligned}$$

Constraint (3)&(5) – (7)

$$\begin{aligned}
\Psi_{ij}^t &= P_{ij}^t \mu_i^t \sum_{k \in K} w_{ik} q_{ik}, \forall i, j \in I, t \in T \\
\psi_{ij}^t &\geq \alpha \Psi_{ij}^t, \forall i \in I, t \in T \\
\psi_{ij}^t &\leq \Psi_{ij}^t, \forall i, j \in I, t \in T \\
\psi_{ij}^t &= P_{ij}^t \sum_{l \in I} \psi_{il}^t, \forall i, j \in I, t \in T \\
\psi_{ij}^t &\leq \psi'_{ij}^t, \forall i, j \in I, t \in T
\end{aligned}$$

$$\begin{aligned}
\psi_{ij}^t &\leq P_{ij}^t \mu_i^t x_j, \forall i, j \in I, t \in T \\
\psi_{ij}'^t + P_{ij}^t \mu_i^t (x_j - 1) &\leq \psi_{ij}^t, \forall i, j \in I, t \in T \\
\sum_j \psi_{ji}^t + \sum_j \phi_{ji}^t &= \sum_j \psi_{ij}^t + \sum_j \phi_{ij}^t, \forall i \in I, t \in T \\
\lambda_i^t &= P_c \sum_{j \in J} \psi_{ji}^t, \forall i \in I, t \in T \\
\sum_{i \in I} \frac{\alpha}{1-\alpha} x_i + \sum_{j \in I} \sum_{i \in I} t_{ij} \frac{\psi_{ij}^t}{l(t)} + \sum_{i \in I} \sum_{j \in I} \tau_{ij} \frac{\phi_{ij}^t}{l(t)} + \sum_{i \in I} t_c \frac{\lambda_i^t}{l(t)} &\leq N, \forall t \in T \\
N, q_{ik}, \psi_{ij}^t, \psi_{ij}'^t, \Psi_{ij}^t, \phi_{ij}^t, \lambda_i^t &\geq 0, \forall i, j \in I, \forall k \in K, \forall t \in T \\
x_i &\in \{0, 1\}, \forall i \in I.
\end{aligned}$$

### B.5. Proof of Proposition 2

Given a service region design  $I' \subseteq I$ , let  $q'_{ik}$  be the realized adoption rate, e.g.  $q'_{ik} = \text{Prob}(\sum_{j \in I'} a_{ij} x_j \geq b_k)$ . Note that the fleet size constraint (21) is binding, the formulation (22) becomes a linear program below:

$$\begin{aligned}
\max_{q_{ik}, \psi_{ij}, \phi_{ij}} & \sum_{i \in I'} \sum_{k \in K} f Q_{ik} q_{ik} - \sum_{i \in I'} g_i x_i + \xi \left( \sum_{j \in I'} \sum_{i \in I'} r t_{ij} \psi_{ij} - \sum_{i \in I'} \sum_{j \in I'} \eta \tau_{ij} \phi_{ij} - \sum_{i \in I'} c P_c \sum_{j \in I'} \psi_{ji} \right) \\
& - h \left( \sum_{i \in I'} \frac{\alpha}{1-\alpha} x_i + \sum_{j \in I'} \sum_{i \in I'} t_{ij} \psi_{ij} + \sum_{i \in I'} \sum_{j \in I'} \tau_{ij} \phi_{ij} + \sum_{i \in I'} t_c P_c \sum_{j \in I'} \psi_{ji} \right) \\
\text{s.t.} & \\
& q_{ik} \leq q'_{ik}, \forall i \in I', \forall k \in K \\
& \psi_{ij} \geq \alpha P_{ij} \mu_i \sum_{k \in K} w_{ik} q_{ik}, \forall i \in I' \\
& \psi_{ij} \leq P_{ij} \mu_i \sum_{k \in K} w_{ik} q_{ik}, \forall i, j \in I' \\
& \psi_{ij} = P_{ij} \sum_{l \in I'} \psi_{il}, \forall i, j \in I' \\
& \sum_{j \in I'} \psi_{ji} + \sum_{j \in I'} \phi_{ji} = \sum_{j \in I'} \psi_{ij} + \sum_{j \in I'} \phi_{ij}, \forall i \in I' \\
& q_{ik}, \psi_{ij}, \phi_{ij} \geq 0, \forall i, j \in I', \forall k \in K.
\end{aligned}$$

Since the service region design  $I'$  is given, the terms with  $x_i$  are constant and can be omitted. We define an equivalent objective function

$$\begin{aligned}
\mathbf{H}(q_{ik}, \psi_{ij}, \phi_{ij}) &= \sum_{i \in I'} \sum_{k \in K} f Q_{ik} q_{ik} + \sum_{j \in I'} \sum_{i \in I'} [(\xi r - h) t_{ij} - P_c (\xi c + h t_c)] \psi_{ij} - \sum_{j \in I'} \sum_{i \in I'} (\xi \eta + h) \tau_{ij} \phi_{ij} \\
&= \sum_{i \in I'} \sum_{k \in K} f Q_{ik} q_{ik} + \sum_{j \in I'} \sum_{i \in I'} (u_{ij} \psi_{ij} - v_{ij} \phi_{ij})
\end{aligned}$$

where  $u_{ij} = (\xi r - h) t_{ij} - P_c (\xi c + h t_c)$  and  $v_{ij} = (\xi \eta + h) \tau_{ij}$ .

Let  $y_{ik}, m_{ij}, n_{ij}, s_{ij}$  and  $z_i$  be the dual variables. We write the dual formulation of the above linear program as

$$\min_{y_{ik}, m_{ij}, n_{ij}, s_{ij}, z_i} \sum_{i \in I'} \sum_{k \in K} q'_{ik} y_{ik}$$

s.t.

$$fQ_{ik} + \sum_{j \in I'} (m_{ij} - \alpha n_{ij}) P_{ij} \mu_i w_{ik} \leq y_{ik}, \forall i \in I', \forall k \in K \quad (16)$$

$$u_{ij} - m_{ij} + n_{ij} + \sum_{l \in I'} P_{il} s_{il} - s_{ij} + z_j - z_i \leq 0, \forall i, j \in I' \quad (17)$$

$$-v_{ji} \leq z_j - z_i, \forall i, j \in I' \quad (18)$$

$$y_{ik}, m_{ij}, n_{ij} \geq 0, \forall i, j \in I'$$

From inequalities (17) and (18), we have

$$\begin{aligned} u_{ij} - v_{ji} + \sum_{l \in I'} P_{il} s_{il} - s_{ij} &\leq m_{ij} - n_{ij} \leq m_{ij} - \alpha n_{ij}, \forall i, j \in I' \\ \Rightarrow \sum_{j \in I'} P_{ij} (u_{ij} - v_{ji}) &\leq \sum_{j \in I'} P_{ij} (m_{ij} - \alpha n_{ij}), \forall i \in I' \end{aligned}$$

This inequality provides a lower bound to the LHS of constraint (16). That is,

$$fQ_{ik} + \mu_i w_{ik} \sum_{j \in I'} P_{ij} (u_{ij} - v_{ji}) \leq y_{ik}, \forall i \in I', \forall k \in K$$

To have the adoption rate constraint  $q_{ik} \leq q'_{ik}$  tight, we need the associated dual variable  $y_{ik} > 0$ . Therefore, by noting that  $v_{ii} = 0$ , the corresponding sufficient condition is to have

$$fQ_{ik} + \mu_i w_{ik} P_{ii} u_{ii} + \mu_i w_{ik} \sum_{\substack{j \in I' \\ j \neq i}} P_{ij} (u_{ij} - v_{ji}) > 0, \forall i \in I', \forall k \in K.$$

□

## Appendix C: Estimation of Key Parameters

### C.1. Utility Parameters

We use the trip distributions that describe customer preferences over destinations as proxies to utility parameters  $\mathbf{a}$ . Our study focuses on the 61 candidate zip codes in San Diego County, excluding remote and military areas. We estimate the origin-destination trip distributions for the 61 candidate zip codes by extrapolating, using a gravity model, from the Car2Go operations data for the 18 zip codes they currently cover. The sample daily trips for each origin-destination pair of the 18 zip codes are counted and the outbound (inbound) trips from (to) each zip code are summarized in Table 2.

**Table 2 Sample Daily Outbound(Inbound) Trips in Current Car2Go Service Region**

|               |               |                 |               |                 |              |
|---------------|---------------|-----------------|---------------|-----------------|--------------|
| <b>91910</b>  | <b>91911</b>  | <b>92101</b>    | <b>92102</b>  | <b>92103</b>    | <b>92104</b> |
| 7.92 (8.19)   | 3.19 (3.27)   | 334.04 (335.23) | 55.69 (54.77) | 144.04 (144.04) | 81.69 (80.5) |
| <b>92105</b>  | <b>92106</b>  | <b>92107</b>    | <b>92108</b>  | <b>92109</b>    | <b>92110</b> |
| 11.23 (10.35) | 45.89 (45.65) | 54.23 (54.92)   | 50.77 (51.92) | 84.08 (83.96)   | 44.92 (46)   |
| <b>92111</b>  | <b>92113</b>  | <b>92115</b>    | <b>92116</b>  | <b>92120</b>    | <b>92123</b> |
| 0.35 (0.35)   | 1.23 (1.19)   | 14.62 (14.85)   | 60.08 (58.73) | 1.12 (1.19)     | 0.12 (0.08)  |

Table 2 suggests a large variation in trip demands of the 18 zip codes. The majority of the trips were generated in the downtown San Diego with zip codes 92101 and 92103, while few trip demands are observed

from zip codes 92111 and 92123. To better capture the demand pattern, we exclude zip codes with very low demands, e.g., 91911, 92111, 92113, 92120 and 92123, in the estimation of the gravity model, since inclusion of these outliers led to significantly worse fits.

We first fit a gravity model for the sample trip rates for one-way trips among 18 zip codes (i.e., trips where origins and destinations are in distinct zip codes). Trips that originate and end within the same zip code are handled later. Besides the (working-age) population factor in the classic gravity model, we also test other socioeconomic factors, such as per capita income, business establishments, students enrollments and workplace population, that may affect the trip distributions. The only statistical significant factors we find are working-age population and per capita income. Similarly, Wills (1986) integrates income as a destination-attribute variable in his trip distribution models. Hence, we fit the gravity model for one-way trips as follows:

$$T_{ij} = \beta_1 \frac{Pop_i Pop_j Inc_i^{\beta_2} Inc_j^{\beta_3}}{dist_{ij}^{\beta_4}} \quad (19)$$

where  $Pop_i$  is the working-age population and  $Inc_i$  is the per capita income in  $i$ . The number of trips generated from  $i$  is proportional to  $Pop_i$  while  $Pop_j$  and  $Inc_j$  are indicators of the attractiveness of destination  $j$ .

Let  $\hat{T}_{ij}^{Car2Go}$  be the observed trips from Car2Go's operations data from  $i$  to  $j$ . The sample daily trip are adjusted by the current adoption rate (current regular members divided by market size in the current service region), e.g.,  $\hat{T}_{ij}^{Car2Go} / (\text{Current Adoption Rate})$ . We then apply log-linear regression to  $\hat{T}_{ij}$  and obtain the gravity model in (19) for the aggregated daily trip distribution below with adjusted R-squared of 0.7515 and residual standard error of 0.9227.

$$T_{ij} = \exp(-62.212) \frac{Pop_i Pop_j Inc_i^{2.253} Inc_j^{2.249}}{dist_{ij}^{2.013}}. \quad (20)$$

For trips that begin and end within the same zip code (round trips), we fit the following model using the same socioeconomic factors as independent variables:

$$T_{ii} = \beta_1 Pop_i Inc_i^{\beta_2}.$$

The fitted model, as shown below, has adjusted R-squared of 0.7845 and residual standard error:

$$T_{ii} = \exp(-43.194) Pop_i Inc_i^{3.413}. \quad (21)$$

With the residual standard errors provided by the regressions, we randomly generate 1000 sample trip distributions for the 61 candidate zip codes using gravity models in (20) and (21). In each sample  $n$ , the sample utility parameter  $\hat{a}_{ij}^n$  is estimated by normalizing the outbound trips by their destinations:

$$\hat{a}_{ij}^n = \frac{\hat{T}_{ij}^n}{\sum_{j \in I} \hat{T}_{ij}^n}.$$

The mean of utility parameter,  $\bar{a}_{ij}$ , is then calculated as the sample average of  $\hat{a}_{ij}^n$ . We also construct the estimated diagonal covariance matrix  $\Gamma_i$  for each  $i$  with  $\sigma_{ij}^2$  set to be sample variance of  $\hat{a}_{ij}^n$  for all origin  $i$  and destination  $j$ .

Lastly, the outbound demand rate  $\mu_i$  is estimated by averaging the total outbound trips  $\hat{\mu}_i^n = \sum_{j \in I} \hat{T}_{ij}^n$  over all samples. The average travel speed in San Diego is assumed to be 31 mph (John Kleint 2016) for conversion of travel time to travel distance as  $d_{ij}(\text{mile}) = t_{ij}(\text{min}) \times \frac{31(\text{mph})}{60(\text{min/h})}$ .

## C.2. Adoption Requirement

The aspirational level  $b$  is evaluated based on the mode choice data in CHTS. We summarize the mode choice distribution in 4 categories: non-moto (including walking and cycling, etc.), private car (including driver, passenger, car rental and carpool, etc.), bus (including bus and shuttle, etc.), and rail (including subways and light rail, etc.). We focus on motorized trips, and group bus and rail modes to public transportation. Using K-means clustering approach (e.g., Hartigan and Wong (1979)), we group the individuals into 3 clusters with different mode choice distributions as shown in Table 3.

**Table 3 Mode Choice Distribution**

| Group | Car  | Public |
|-------|------|--------|
| 1     | 0.01 | 0.99   |
| 2     | 0.53 | 0.47   |
| 3     | 1.00 | 0.00   |

For instance, the potential travelers from Group 2 choose to drive for 53% of their trips. We hence set  $b = 53\%$  for these customers, i.e., they would be willing to switch to car sharing if it covers at least 53% of their travel needs. After adoption, customers will use car sharing service regularly with destinations that are in the service region. Following the same reasoning, Groups 1 and 3 are not target segments for Car2Go because these customers either never drive or rely too much on their own cars that they would require 100% service coverage. As a result, the target Group 2 account for 4.05% of the entire population and we set  $Q_{ik} = 20\% \times 4.05\% \times Pop_i$ , where  $Pop_i$  is the population in area  $i$ , by assuming 20% local market share in car sharing business. Due to the limited sample sizes at zip code level, we assume all zip codes share the same mode choice distribution.

## C.3. Coverage Costs

The fixed coverage cost associated with serving region  $i$  includes investments in charging infrastructure, in partnership with charging service providers. As planned in 2011, Car2Go's fleet in San Diego can be recharged at 1000 Blink EV charging stations (Engadget 2014). We use the EV charging station data from U.S. Department of Energy (2014) to estimate the number of chargers required in each zip code to support the EV sharing system. For each zip code in the current service region, we compute the charger density (CD) by dividing the number of chargers (CG) with the land area (LA). From linear regression with various socioeconomic factors, we find that number of business establishment (BE) is the only significant factor to CD with the fitted model as below

$$CD_i = 3.19 \exp(-11) BE_i.$$

The number of chargers needed for each candidate area is then approximated by

$$CG_i = \max\{CD_i, 0\} \times LA_i.$$

Suppose the investment in each charger by Car2Go through partnership with Blink is  $h_c$  (e.g., \$800, about half of the typical cost to install a household Level 2 charger in California (California Plug-in Electric Vehicle Collaborative 2016)), then the coverage cost for region  $i$  follows  $g_i = h_c CG_i$ .

## Appendix D: Heuristic Formulation

### D.1. H1 Formulation

The heuristic  $H_1$  solves the following mixed integer program based on a stylized view on adoption behavior (assuming  $q_s = b$ ):

$$\begin{aligned} & \max_{\substack{x_i, N, \Psi_{ij} \\ \psi_{ij}, \psi'_{ij}, \phi_{ij}, \lambda_i}} \sum_{i \in I} f Q_i q_s - \sum_{i \in I} g_i x_i + \xi \left( \sum_{j \in I} \sum_{i \in I} r t_{ij} \psi_{ij} - \sum_{i \in I} \sum_{j \in I} \eta \tau_{ij} \phi_{ij} - \sum_{i \in I} c \lambda_i \right) - h N \\ & \text{s.t.} \\ & \text{Constraint (9) – (21)} \\ & \Psi_{ij} = \mu_i P_{ij} q_s, \forall i \in I, j \in J \\ & N, \psi_{ij}, \psi'_{ij}, \Psi_{ij}, \phi_{ij}, \lambda_i \geq 0 \\ & x_i \in \{0, 1\}, \forall i \in I. \end{aligned}$$

### D.2. H2 Formulation

The heuristic  $H_2$  solves the following mixed integer SOCP formulated based on a stylized view on fleet operations:

$$\begin{aligned} & \max_{\substack{x_i, q_i, N, \Psi_{ij} \\ \psi_{ij}, \psi'_{ij}, \phi_{ij}, \lambda_i}} \sum_{i \in I} f Q_i q_i - \sum_{i \in I} g_i x_i + \xi \left( \sum_{j \in I} \sum_{i \in I} r t_{ij} \psi_{ij} - \sum_{i \in I} \sum_{j \in I} \eta \tau_{ij} \phi_{ij} - \sum_{i \in I} c \lambda_i \right) - h N \\ & \text{s.t.} \\ & \text{Constraint (3)\&(5) – (19)} \\ & N = \bar{t} \times \sum_{i \in I} x_i \mu_i q_i \\ & N, \psi_{ij}, \psi'_{ij}, \Psi_{ij}, \phi_{ij}, \lambda_i \geq 0 \\ & x_i \in \{0, 1\}, \forall i \in I. \end{aligned}$$

### D.3. H3 Formulation

The heuristic  $H_3$  solves the following mixed integer program formulated based on a stylized view on both adoption behavior and fleet operations:

$$\begin{aligned} & \max_{\substack{x_i, N, \Psi_{ij} \\ \psi_{ij}, \psi'_{ij}, \phi_{ij}, \lambda_i}} \sum_{i \in I} f Q_i q_s - \sum_{i \in I} g_i x_i + \xi \left( \sum_{j \in I} \sum_{i \in I} r t_{ij} \psi_{ij} - \sum_{i \in I} \sum_{j \in I} \eta \tau_{ij} \phi_{ij} - \sum_{i \in I} c \lambda_i \right) - h N \\ & \text{s.t.} \\ & \text{Constraint (9) – (19)} \\ & \Psi_{ij} = \mu_i P_{ij} q_s, \forall i \in I, j \in J \\ & N = \bar{t} \times \sum_{i \in I} x_i \mu_i q_i \\ & N, \psi_{ij}, \psi'_{ij}, \Psi_{ij}, \phi_{ij}, \lambda_i \geq 0 \\ & x_i \in \{0, 1\}, \forall i \in I. \end{aligned}$$

---

## References

- California Plug-in Electric Vehicle Collaborative. 2016. Charging equipment costs. [http://driveclean.ca.gov/pev/Costs/Charging\\_Equipment.php](http://driveclean.ca.gov/pev/Costs/Charging_Equipment.php).
- El Ghaoui, Laurent, Maksim Oks, Francois Oustry. 2003. Worst-case value-at-risk and robust portfolio optimization: A conic programming approach. *Operations Research* **51**(4) 543–556.
- Engadget. 2014. Car2go brings north america’s first all-electric carsharing program to san diego. <http://www.engadget.com/2011/07/14/car2go-brings-north-americas-first-all-electric-carsharing-prog/>.
- Green, Linda, Peter Kolesar. 1991. The pointwise stationary approximation for queues with nonstationary arrivals. *Management Science* **37**(1) 84–97.
- Hartigan, John A, Manchek A Wong. 1979. Algorithm AS 136: A k-means clustering algorithm. *Applied statistics* 100–108.
- John Kleint. 2016. Cityspeed - road network efficiency via online mapping. <http://cityspeed.sourceforge.net/>.
- U.S. Department of Energy. 2014. Alternative Fuels Data Center. [http://www.afdc.energy.gov/data\\_download/](http://www.afdc.energy.gov/data_download/).
- Wills, Michael J. 1986. A flexible gravity-opportunities model for trip distribution. *Transportation Research Part B: Methodological* **20**(2) 89–111.
